# Supplementary material for: Metal–organic frameworks based on 1,3,5-triazine-2,4,6-triyltrithio-triacetate: structures, topologies, photoluminescence and photocatalytic properties
Source: Royal Society of Chemistry journal article supplement (doi:10.1039/c3dt00054k), 2013-01-01
Supplement: c3dt00054k.pdf [file c3dt00054k.pdf]

# Metal-organic frameworks based on 1,3,5 – triazine - 2,4,6- triyltrithio- tri-acetate: Structures, topologies, photoluminescence and photocatalytic properties

Yun Gong,<sup>a</sup> Peng-Gang Jiang,<sup>a</sup> Ying-Xia Wang,<sup>b</sup> Tao Wu<sup>a</sup> and Jian-Hua Lin<sup>\*a</sup>

<sup>a</sup>Department of Applied Chemistry, College of Chemistry and Chemical Engineering,  
Chongqing University, Chongqing 400030, P. R. China Tel: +86-023-65102316 E-mail:  
jhlin@cqu.edu.cn or jhlin@pku.edu.cn

<sup>b</sup> State Key Laboratory of Rare Earth Materials Chemistry and Applications, College of  
Chemistry and Molecular Engineering, Peking University, Beijing 100871, China

**Table S1** Selected bond lengths (Å) and angles (°) for complexes **1-3**

---

| <i>Complex 1</i>    |            |                     |           |
|---------------------|------------|---------------------|-----------|
| Pb(1)-O(3)          | 2.464(6)   | Pb(1)-O(2)          | 2.542(6)  |
| Pb(1)-O(8)#1        | 2.890(7)   | Pb(1)-O(6)          | 2.696(6)  |
| Pb(1)-O(2)#1        | 2.659(5)   | Pb(2)-O(7)#3        | 2.415(6)  |
| Pb(2)-O(1)#5        | 2.854(6)   | Pb(2)-O(3)          | 2.646(6)  |
| O(2)-Pb(1)-O(1)     | 49.86(18)  | O(2)-Pb(1)-O(6)     | 162.0(2)  |
| O(2)-Pb(1)-O(5)#2   | 124.10(17) | O(4)#4-Pb(2)-O(5)#4 | 48.21(19) |
| O(7)#3-Pb(2)-O(1)#5 | 168.4(2)   | O(7)#3-Pb(2)-O(3)   | 80.0(2)   |
| <i>Complex 2*</i>   |            |                     |           |
| Pb(1)-O(5)#6        | 2.418(7)   | Pb(1)-O(7)#7        | 2.879(8)  |
| Pb(1)-O(2)          | 2.431(9)   | Pb(1)-O(6)#8        | 2.936(7)  |

---

---

|                     |            |                     |           |
|---------------------|------------|---------------------|-----------|
| Pb(2)-O(6)#8        | 2.432(8)   | Pb(2)-O(6)#9        | 2.897(8)  |
| O(3)#6-Pb(1)-O(4)#6 | 50.1(2)    | O(3)#6-Pb(1)-O(6)#8 | 157.3(2)  |
| O(2)-Pb(1)-O(4)#6   | 131.3(2)   | O(6)#8-Pb(2)-O(4)#8 | 71.4(2)   |
| O(6)#8-Pb(2)-O(6)#9 | 146.29(11) | O(6)#8-Pb(2)-O(1)   | 89.0(2)   |
| <b>Complex 3</b>    |            |                     |           |
| Ni(1)-O(1)          | 2.078(3)   | Ni(1)-O(7)          | 2.094(4)  |
| Ni(1)-N(5)#11       | 2.091(5)   | Ni(1)-N(4)          | 2.093(5)  |
| Ni(2)-O(6)#12       | 2.058(3)   | Ni(2)-O(3)          | 2.100(3)  |
| Ni(2)-N(7)#13       | 2.081(4)   | Ni(2)-N(6)          | 2.094(4)  |
| O(1)#10-Ni(1)-O(1)  | 178.54(18) | O(1)-Ni(1)-O(7)     | 88.10(14) |
| N(5)#11-Ni(1)-O(7)  | 88.79(9)   | N(4)-Ni(1)-O(7)     | 91.21(9)  |
| N(5)#11-Ni(1)-N(4)  | 180.000(1) | O(6)#12-Ni(2)-O(3)  | 87.92(14) |
| O(6)#12-Ni(2)-O(9)  | 175.96(14) | N(7)#13-Ni(2)-O(8)  | 85.96(14) |
| N(6)-Ni(2)-O(8)     | 176.52(15) | N(7)#13-Ni(2)-N(6)  | 92.08(16) |

---

Symmetry transformations used to generate equivalent atoms:

#1  $-x+1, -y+1, -z+1$     #2  $x-1, -y+1/2, z-1/2$     #3  $-x+1, -y+1, -z+2$     #4  $x-1, y, z$   
#5  $x, -y+1/2, z+1/2$     #6  $-x+1, -y, -z+1$     #7  $-x+1, -y+1, -z+2$     #8  $x, y+1, z+1$   
#9  $-x, -y, -z+1$     #10  $-x+1, y, -z+1/2$     #11  $x, y-1, z$     #12  $x, -y+1, z+1/2$   
#13  $-x+1/2, y-1/2, -z+1/2$

**\*In complex 2, Pb2 is found close to the inversion center rather than right on it.**

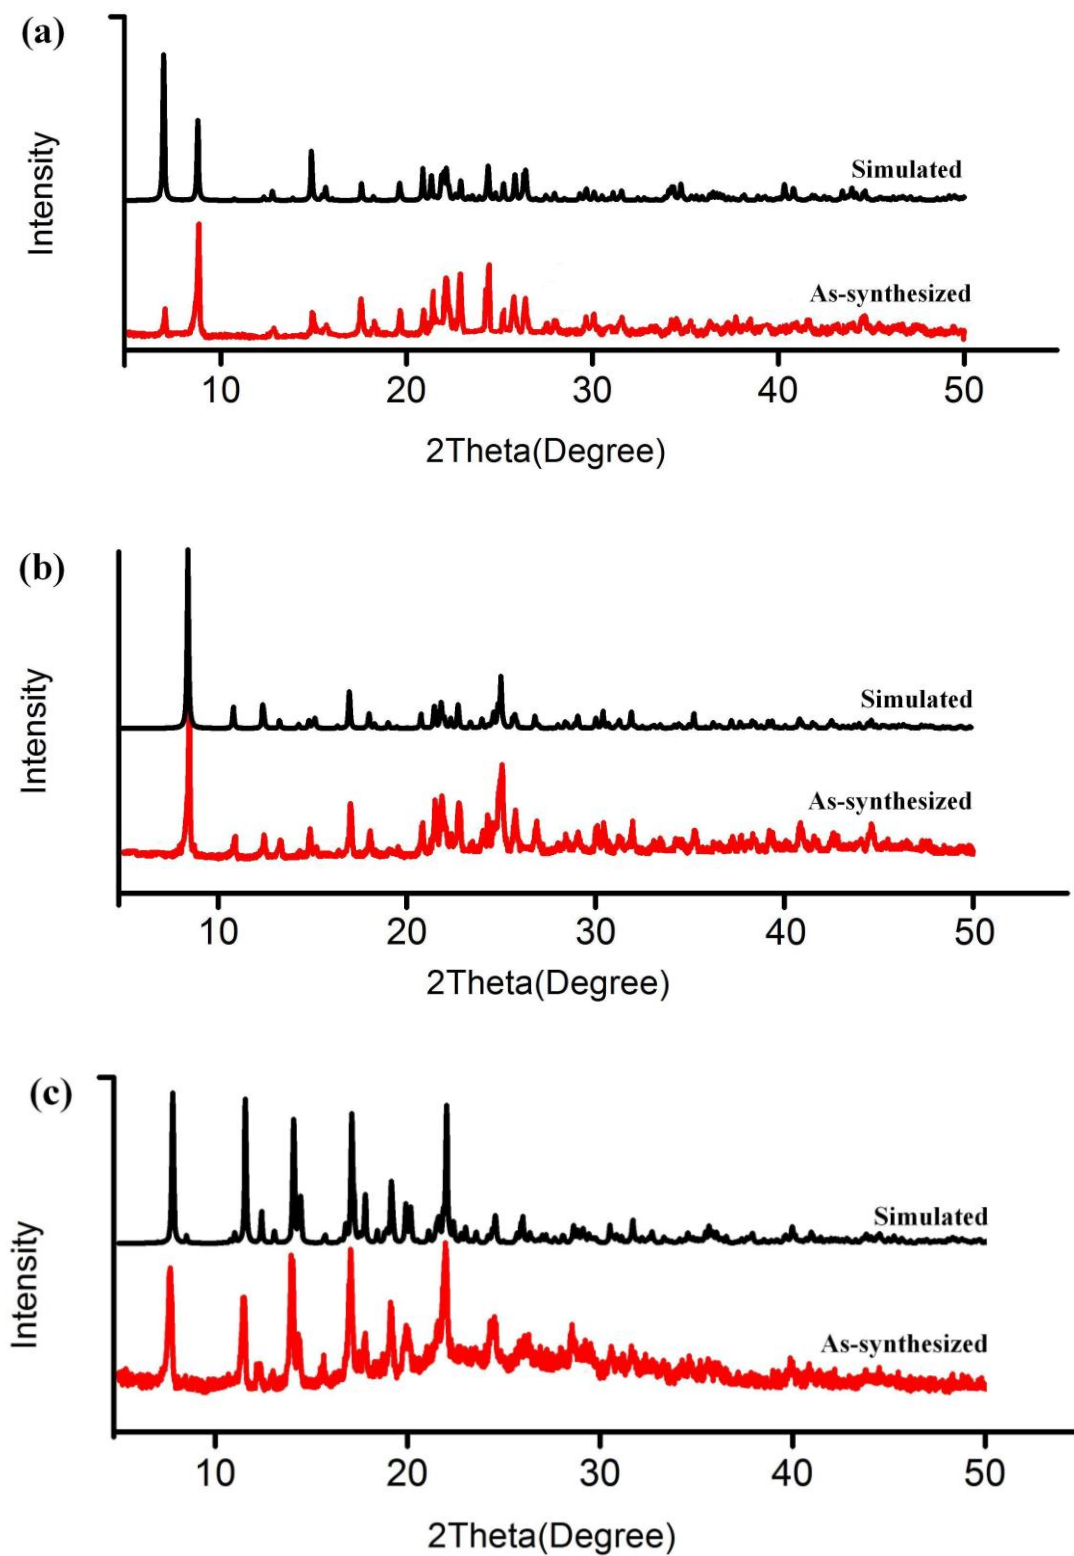

**Fig.S1** The powder XRD patterns for complexes **1** (a), **2** (b) and **3** (c).

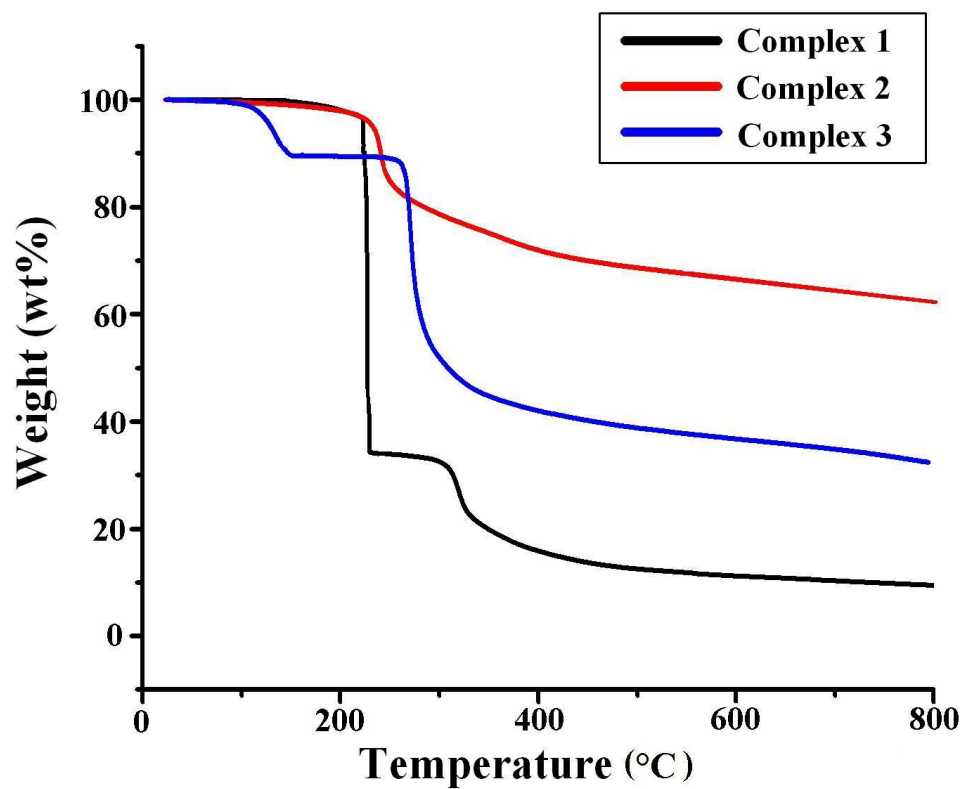

**Fig. S2** Thermogravimetric curves of complexes **1** (black), **2** (red) and **3** (blue).

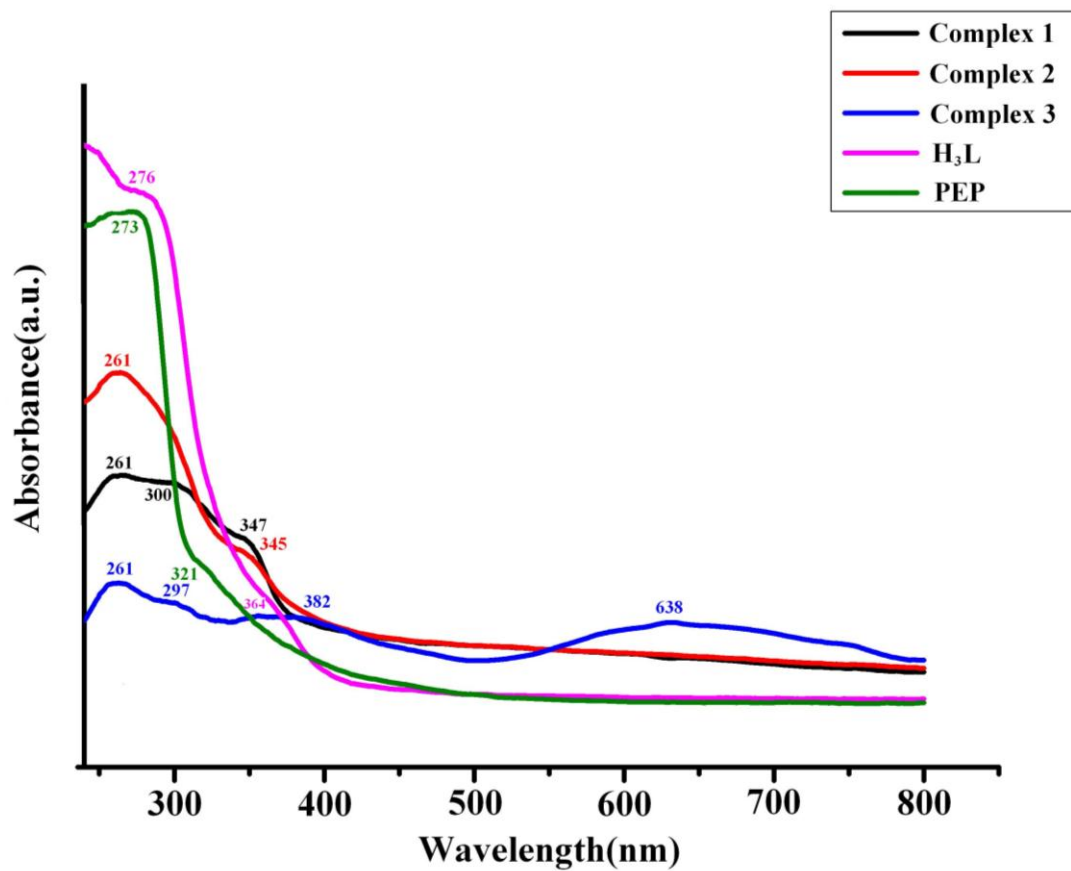

**Fig. S3** UV-vis absorption spectra at room temperature for the free organic ligands and complexes **1-3**.

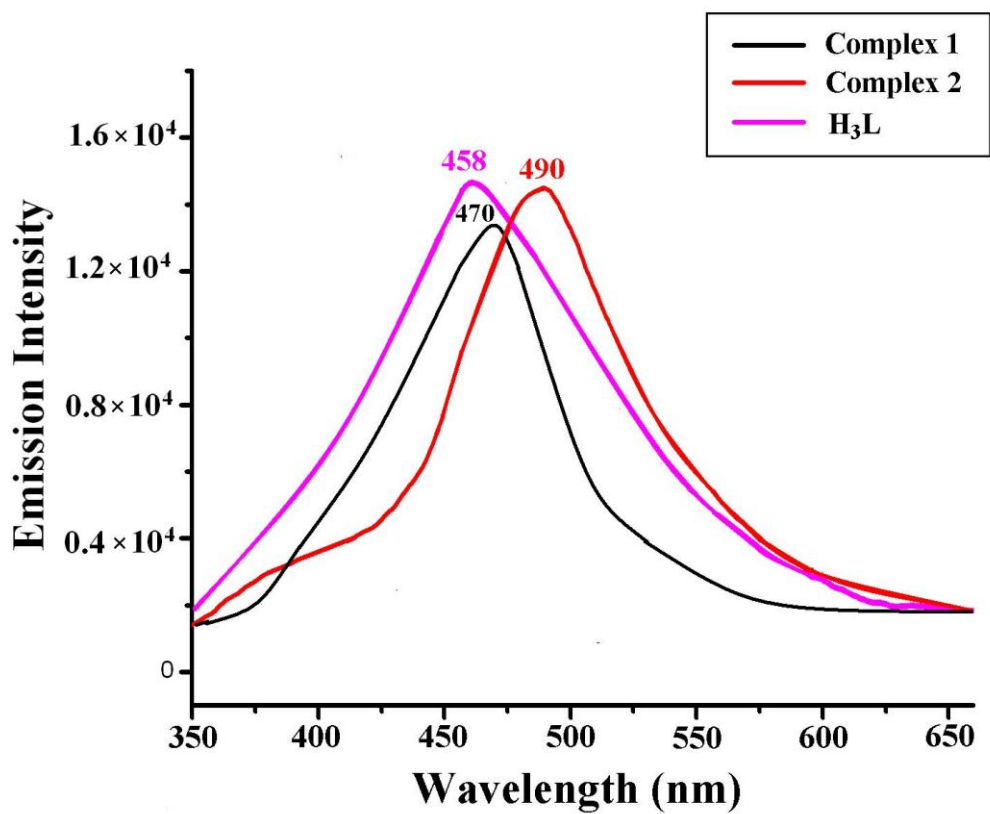

**Fig. S4** Solid-state emission spectra at room temperature for the free organic ligand **H<sub>3</sub>L** and complexes **1-2**.

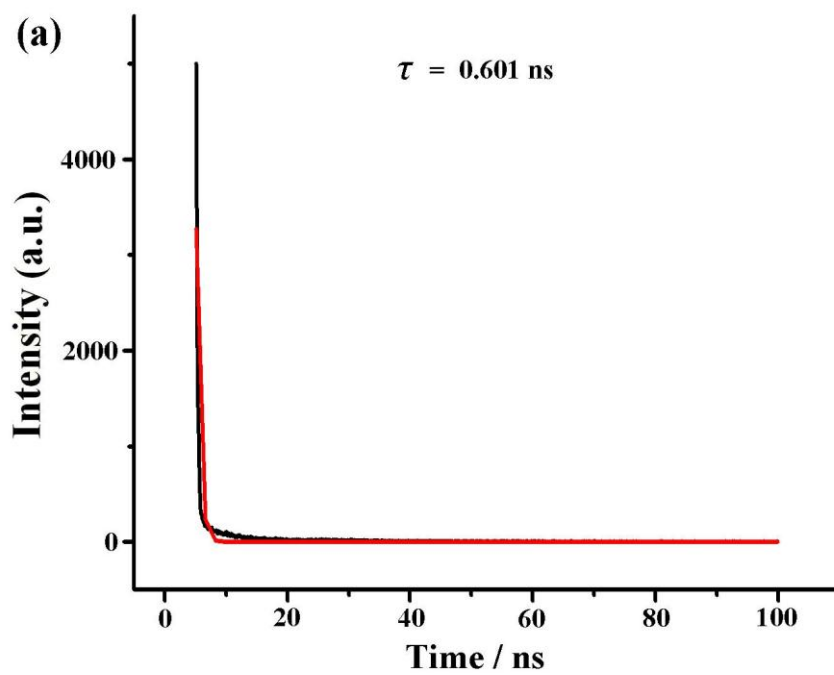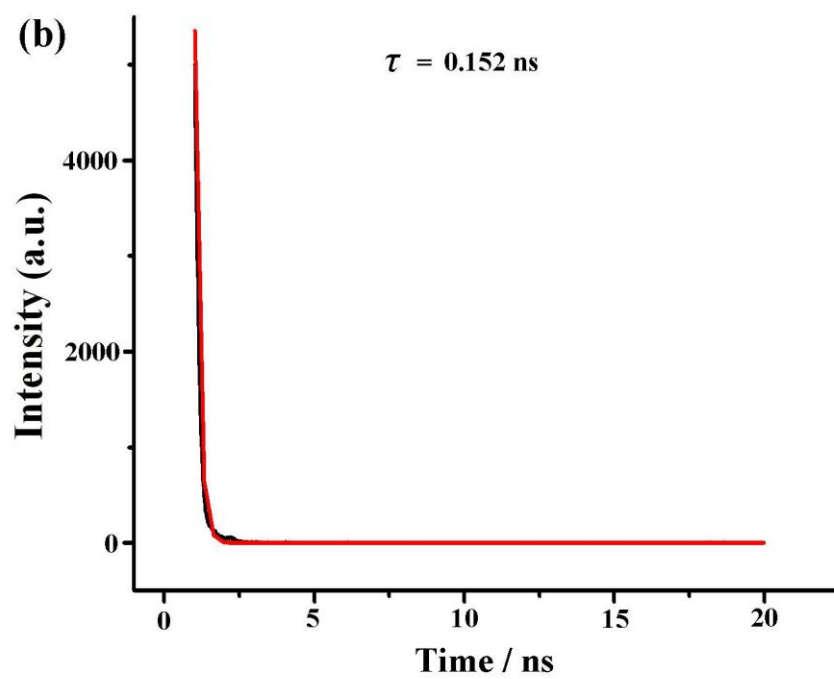

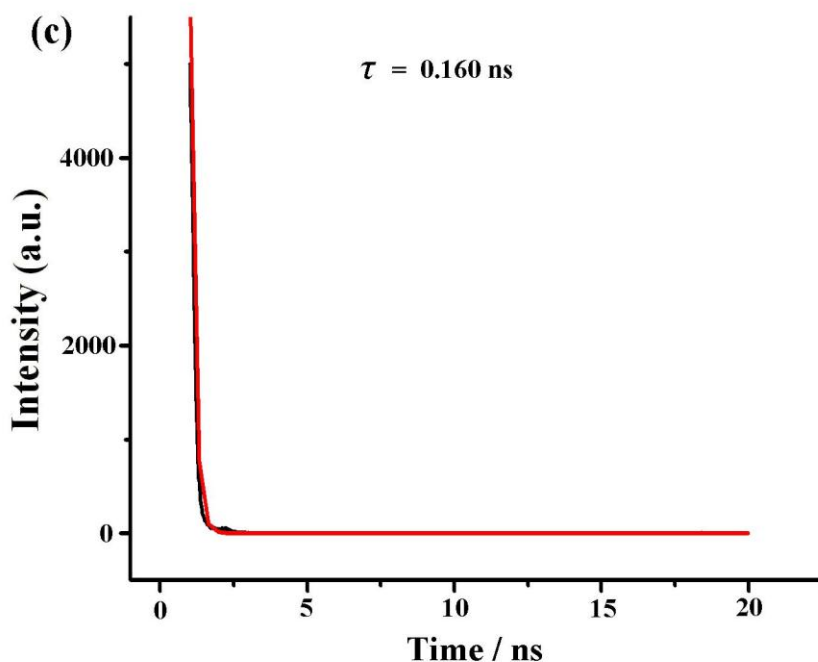

**Fig. S5.** Typical luminescence decay profile observed in the solid state at room temperature (black lines) and the corresponding monoexponential fits (red lines) for **H<sub>3</sub>L** (a), complexes **1** (b) and **2** (c).

The equation  $I_t = A \times \exp(-t/\tau)$  was utilized for fitting the fluorescence decay curves, which gave the best parameters as  $A = 1.527 \times 10^7$  and  $\tau = 0.601$  ns with an overall  $\chi^2$  of 0.9467 for **H<sub>3</sub>L**,  $A = 4.359 \times 10^6$  and  $\tau = 0.152$  ns with an overall  $\chi^2$  of 0.9934 for complex **1**,  $A = 3.343 \times 10^6$  and  $\tau = 0.160$  ns with an overall  $\chi^2$  of 0.9852 for complex **2**.



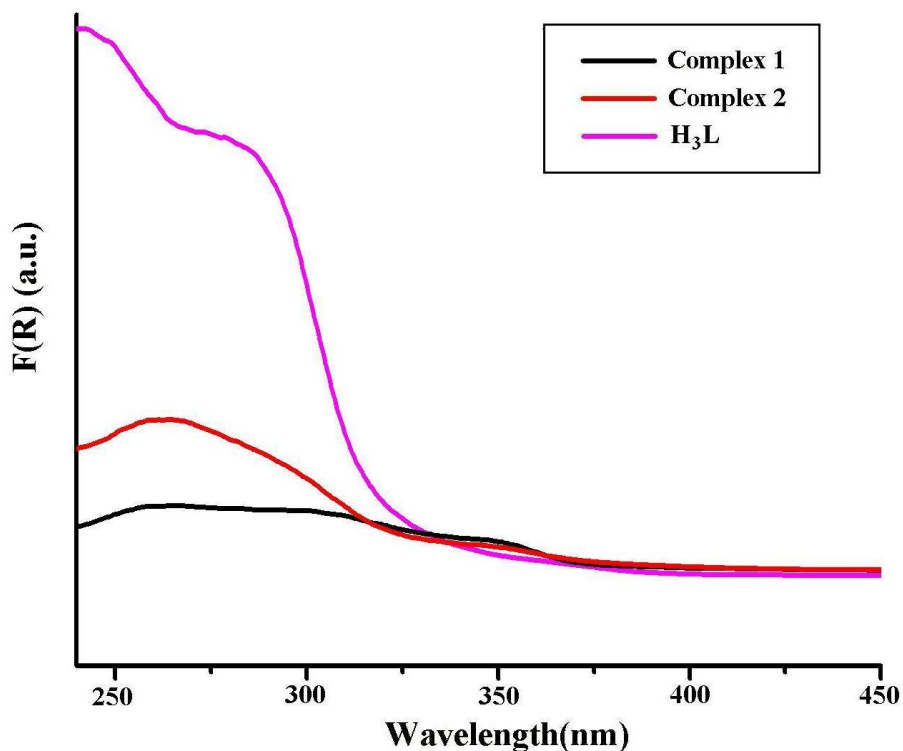

**Fig. S6** The diffuse reflectance spectra of the pure ligand **H<sub>3</sub>L** and complexes **1-2** in Kubelka–Munk units.  $F(R)$  is the Kubelka–Munk function, where  $F(R) = (1-R)^2/2R$ ,  $R$  is the experimentally observed reflectance.

The formula for the calculation of band gap is as follows:

$$\text{Band Gap energy} = hc/\lambda = 1240/\lambda \text{ eV}$$

$$h = \text{planks constant} = 6.626 \times 10^{-34} \text{ Joules} \cdot \text{sec}$$

$$c = \text{Speed of light} = 3.0 \times 10^8 \text{ meter/sec}$$

$$\lambda = \text{cut off wavelength (nm)}$$

$$\text{where } 1\text{eV} = 1.6 \times 10^{-19} \text{ Joules (conversion factor)}$$

$\lambda$ , the cut off wavelength, is obtained according to the diffuse reflectance spectrum  $\{F(R)$  vs. wavelength,  $F(R) = (1-R)^2/2R$ ,  $R$  is the experimentally observed reflectance $\}$ .

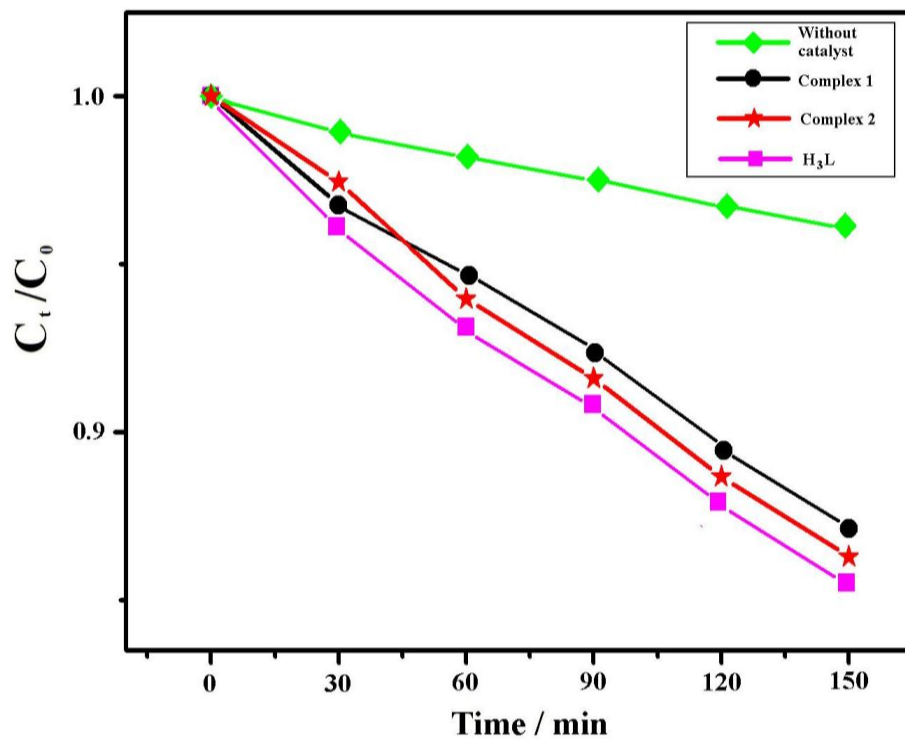

**Fig. S7** Changes in  $C_t/C_0$  plot of MO solutions ( $2.0 \times 10^{-5} \text{ mol} \cdot \text{L}^{-1}$ ) versus reaction time in the absence and presence of 50 mg free organic ligand **H<sub>3</sub>L** or complexes **1–2**.
